# Supplementary material
Source: publisher figshare collection journal article supplement (https://aacr.figshare.com/articles/dataset/_/23183885)
Supplement: Supplementary file 1 [file 40884998]

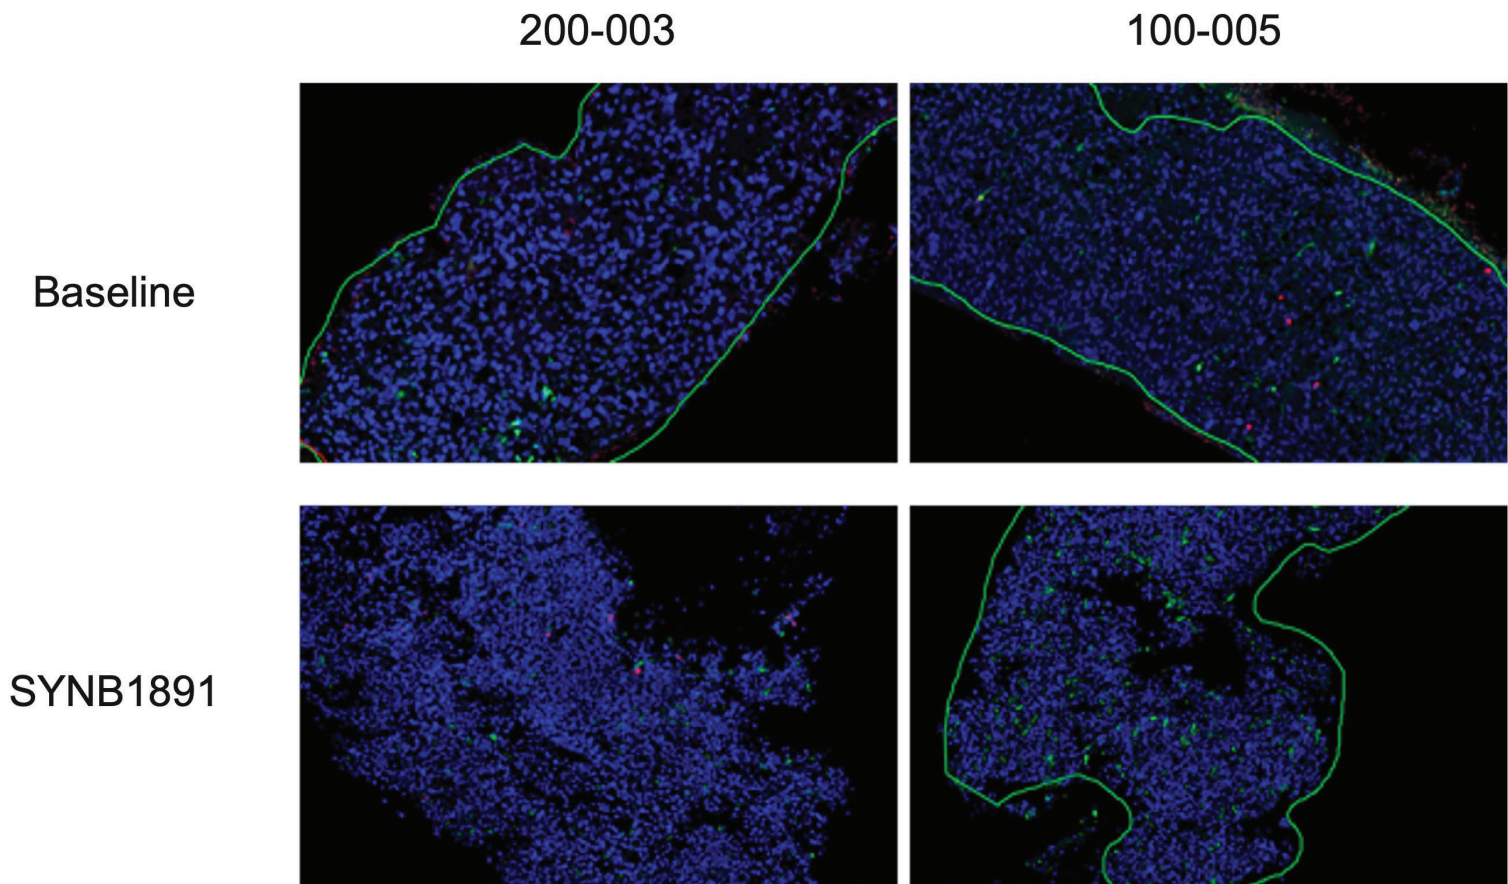

Supplemental Figure 8. Representative immunofluorescence images for patient 200-003 and 100-005. Tumor samples were collected at baseline and on day 22, seven days after the last SYNB1891 treatment in cycle one. Samples were stained for DAPI, CD8+ T cells and CD4+ T cells.
